# Supplementary material for: In Vivo Fitness Adaptations of Colistin-Resistant Acinetobacter baumannii Isolates to Oxidative Stress
Source: PubMed Central journal article supplement (PMC5328574; doi:10.1128/aac.00598-16), 2017-02-23
Supplement: AAC.00598-16_zac003175936s1.pdf [file AAC.00598-16_zac003175936s1.pdf]

## Supplemental Figure 1

A

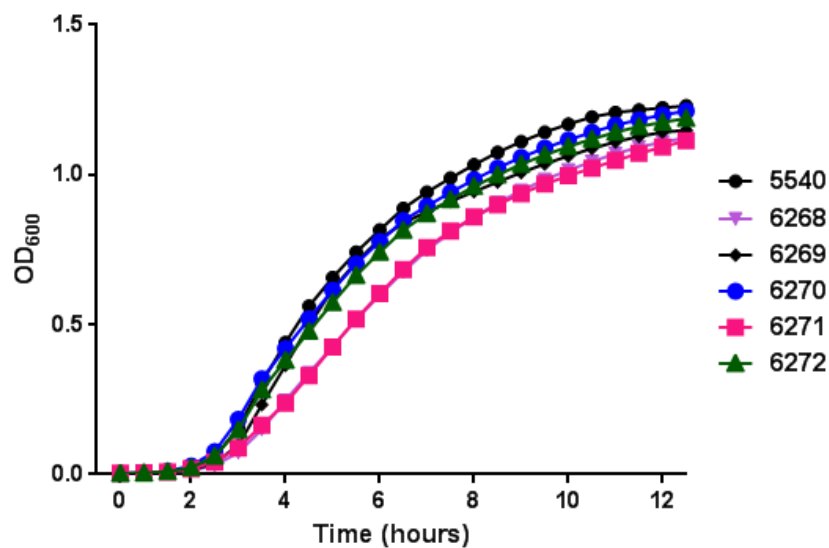

B

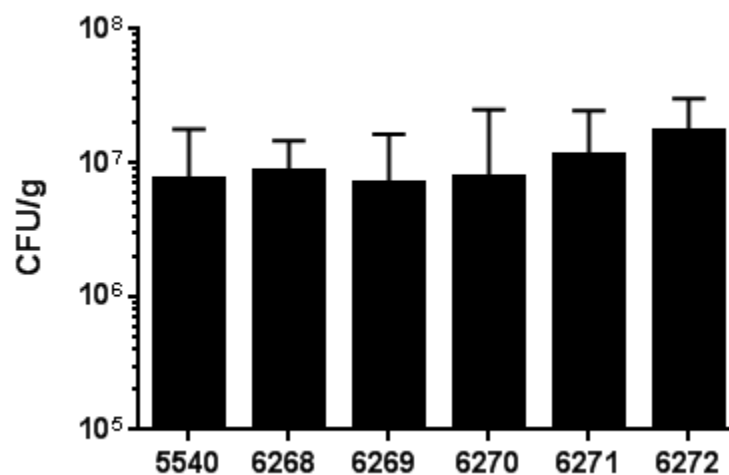

**Growth of *A. baumannii*** (A) Growth curves of *A. baumannii* isolates in LB broth and (B) in the lungs of neutropenic mice at 24h post-infection. Mice were infected intranasally with  $5.0 \times 10^6$  CFU of bacteria suspended in sterile PBS. Statistical analysis of growth curve was performed using ANOVA with Dunnett's test.
